# Supplementary material for: Fast and accurate phylogeny reconstruction using filtered spaced-word matches
Source: PubMed Central journal article supplement — Bioinformatics. 2017 Jan 4;33(7):971–9. doi: 10.1093/bioinformatics/btw776 (PMC5409309; doi:10.1093/bioinformatics/btw776), 2017-01-04
Supplement: btw776_supp.pdf [file btw776_supp.pdf]

Supplementary material to

## Fast and Accurate Phylogeny Reconstruction using Filtered Spaced-Word Matches

Chris-André Leimeister, Salma Sohrabi-Jahromi,  
Burkhard Morgenstern

Submitted to OUP Bioinformatics, 2016

In our paper, we introduced a new way of estimating phylogenetic distances from genomic sequences. We first search for all *spaced-word matches* with respect to a given binary pattern  $P$  of *match* and *don't-care* positions. That is, we are looking for gapfree alignments of the same length as  $P$  where aligned nucleotides must *match* at the match positions while mismatches are possible at the *don't-care* positions. In short, we discard ('filter out') low-scoring and ambiguous spaced-word matches and estimate the phylogenetic distance between the input sequences by looking at the nucleotides that are aligned to each other at the *don't-care* positions of the remaining spaced-word matches.

The number of match positions of the pattern  $P$  is called its *weight*  $w$ . For a given value of  $w$ , we calculate a pattern  $P$  with  $w$  *match* positions using our software tool *rasbhari* [2]. In our implementation, we are using a fixed number of 100 *don't-care* positions; the main parameter that can be adjusted by the user is the weight  $w$ ; our default value is  $w = 12$ . The weight  $w$  influences the number of spaced-word matches that are considered and is therefore important for the program runtime. However, the value of  $w$  should not have any systematic influence on the estimated distances.

As one of the test cases in our paper, we applied our algorithm to a set of 13 bacterial genomes from the *Brucella* genus using values of  $w = 10, 11, \dots, 14$ . With all these values, we obtained exactly the same tree topologie, which is in accordance with a tree published in the literature [1]; the trees are shown in the figures below.

## References

- [1] Jeffrey T. Foster, Stephen M. Beckstrom-Sternberg, Talima Pearson, James S. Beckstrom-Sternberg, Patrick S G Chain, Francisco F. Roberto, Jonathan Hnath, Tom Brettin, and Paul Keim. Whole-genome-based phylogeny and divergence of the genus brucella. *Journal of Bacteriology*, 191:2864–2870, 4 2009.
- [2] Lars Hahn, Chris-André Leimeister, Rachid Ounit, Stefano Lonardi, and Burkhard Morgenstern. *rasbhari*: optimizing spaced seeds for database searching, read mapping and alignment-free sequence comparison. *PLOS Computational Biology*, 12(10):e1005107, 2016.

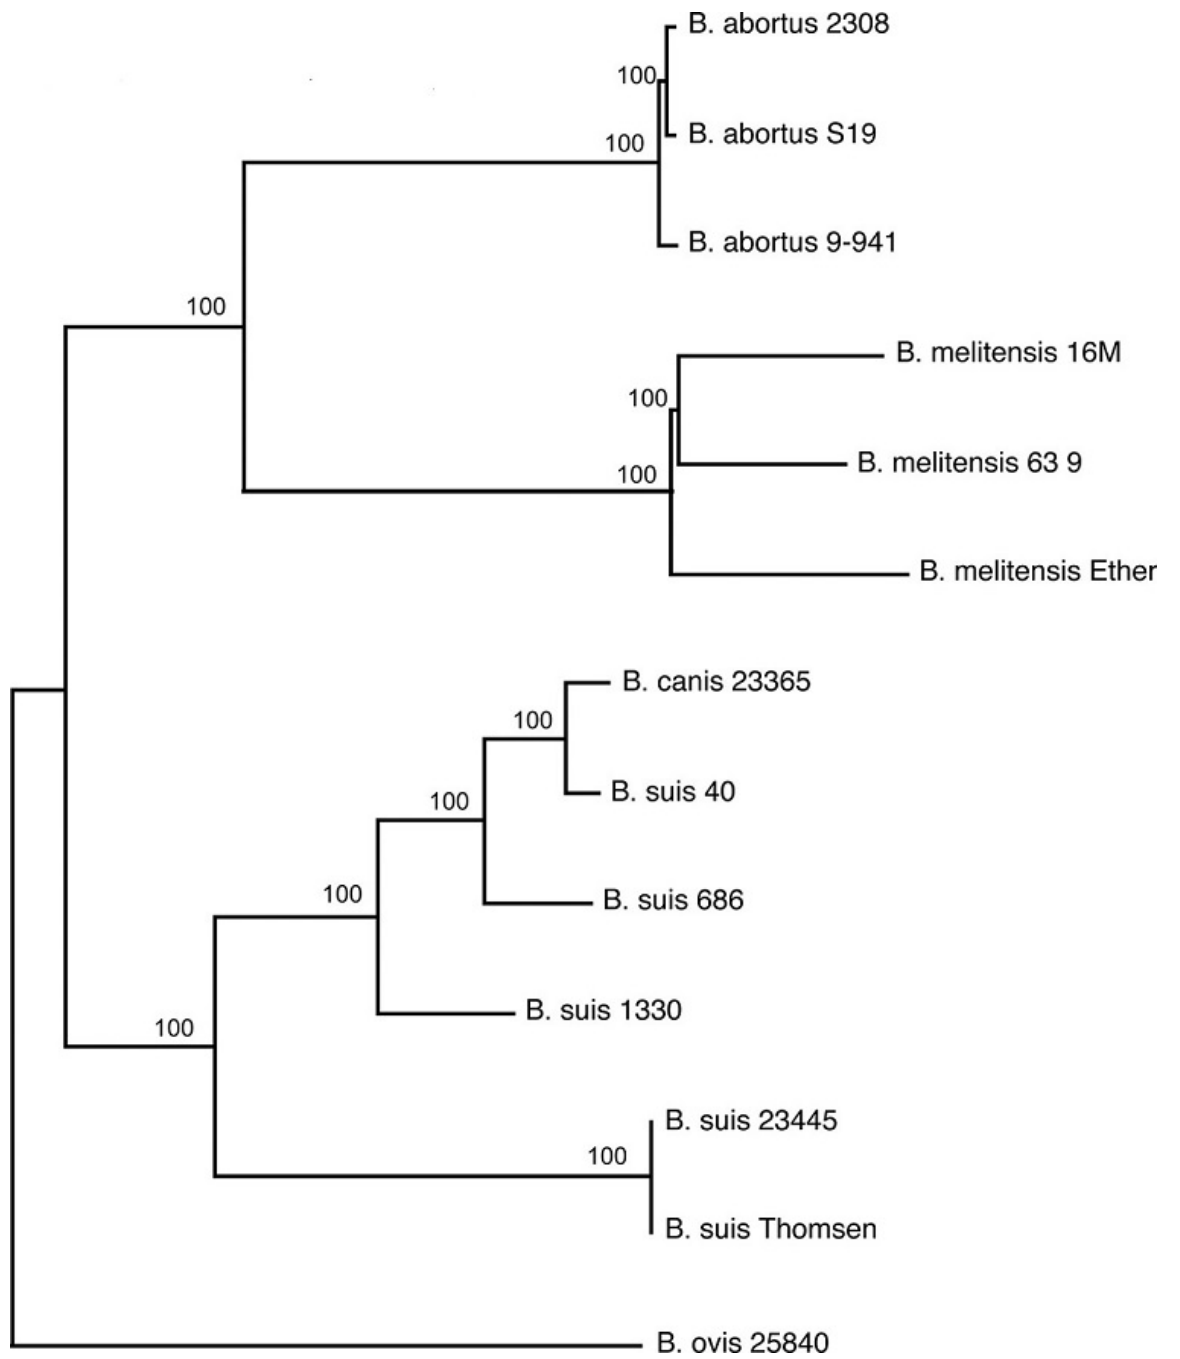

Figure 1: Reference tree from [1].

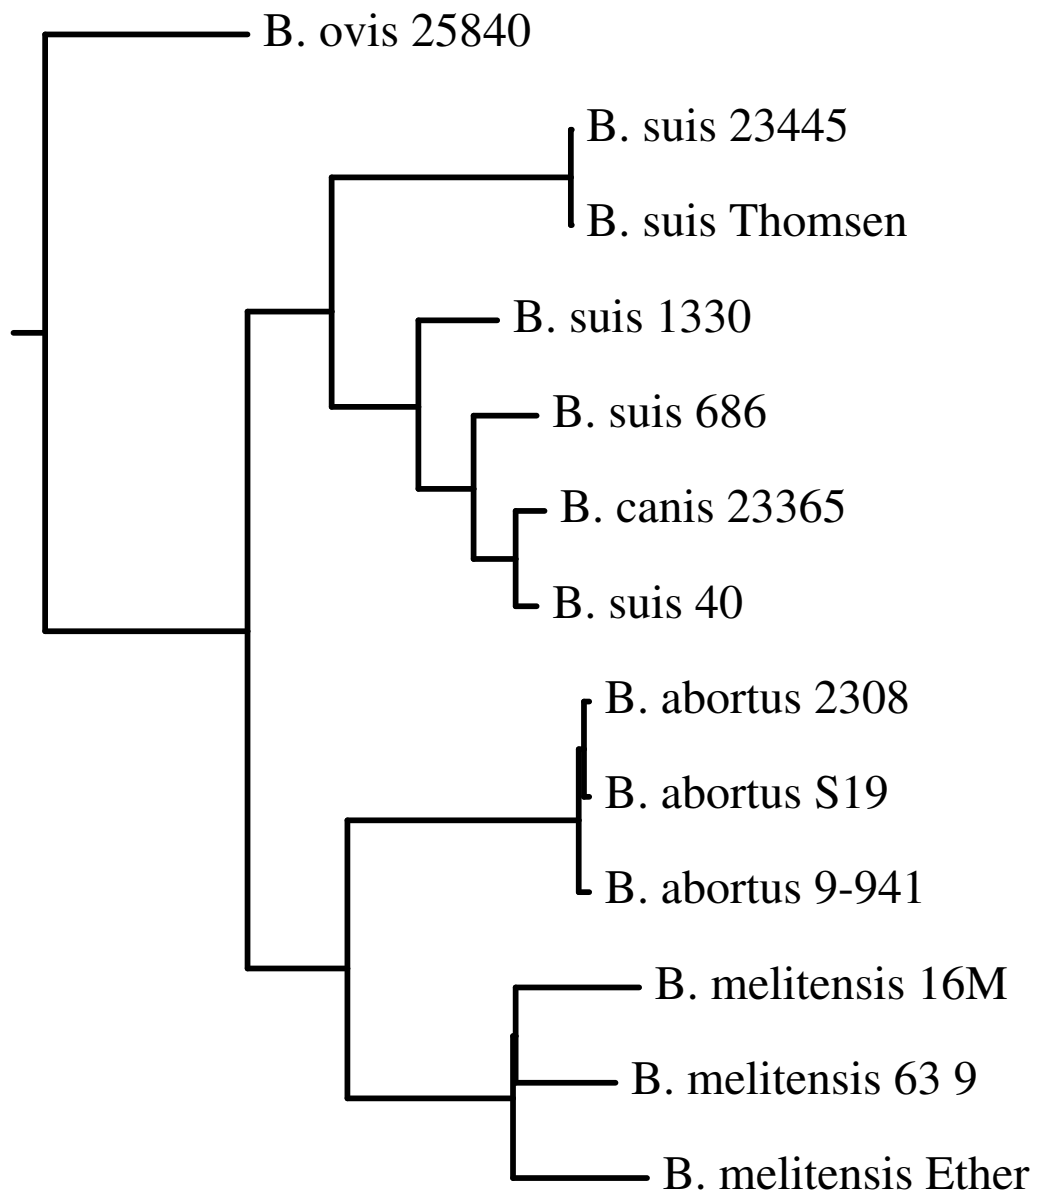

Figure 2: Tree calculated with distance matrix from *FSWM* with  $w = 10$

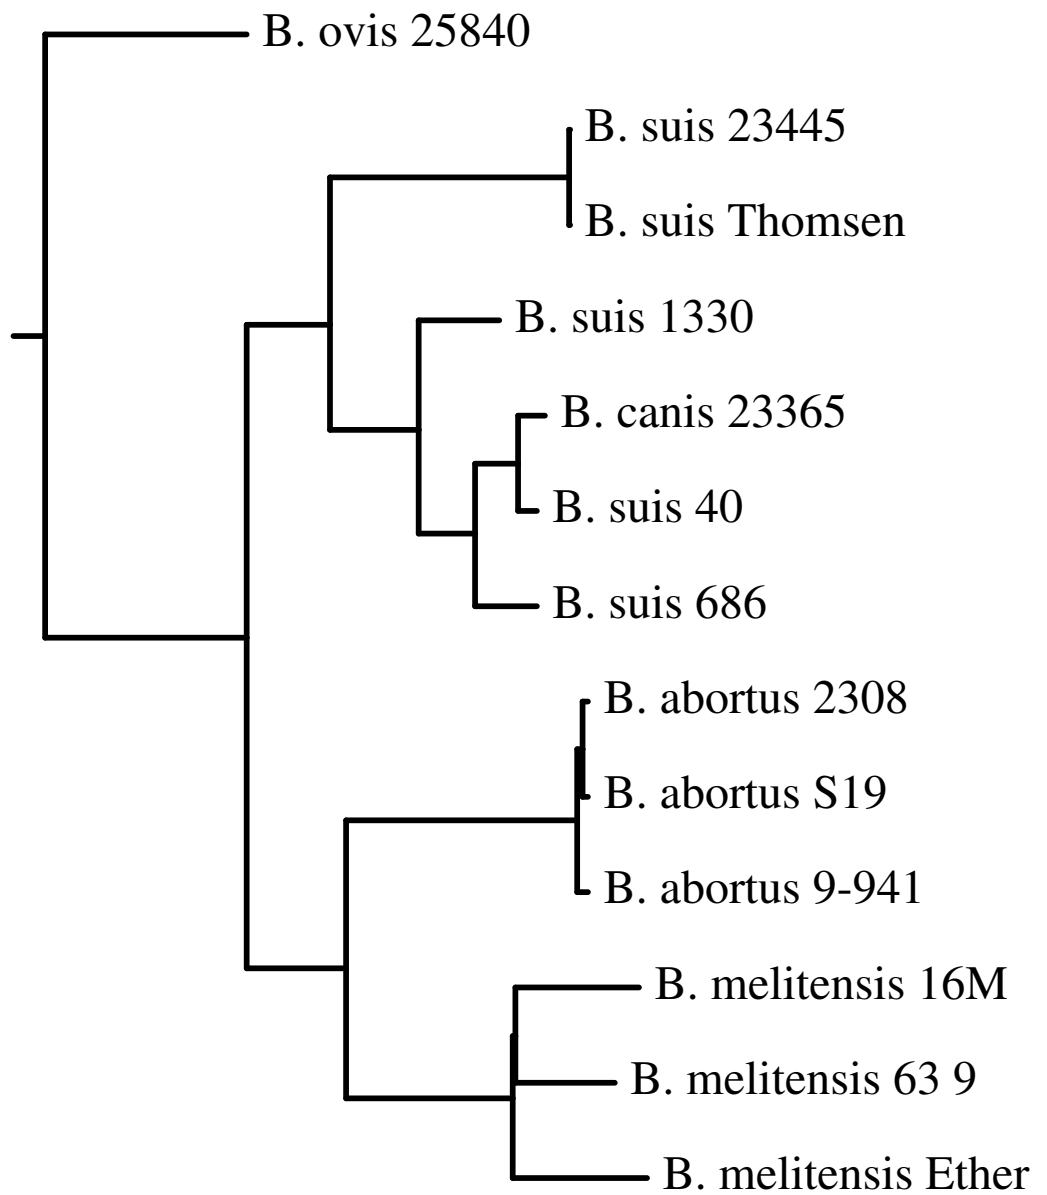

Figure 3: Tree calculated with distance matrix from *FSWM* with  $w = 11$

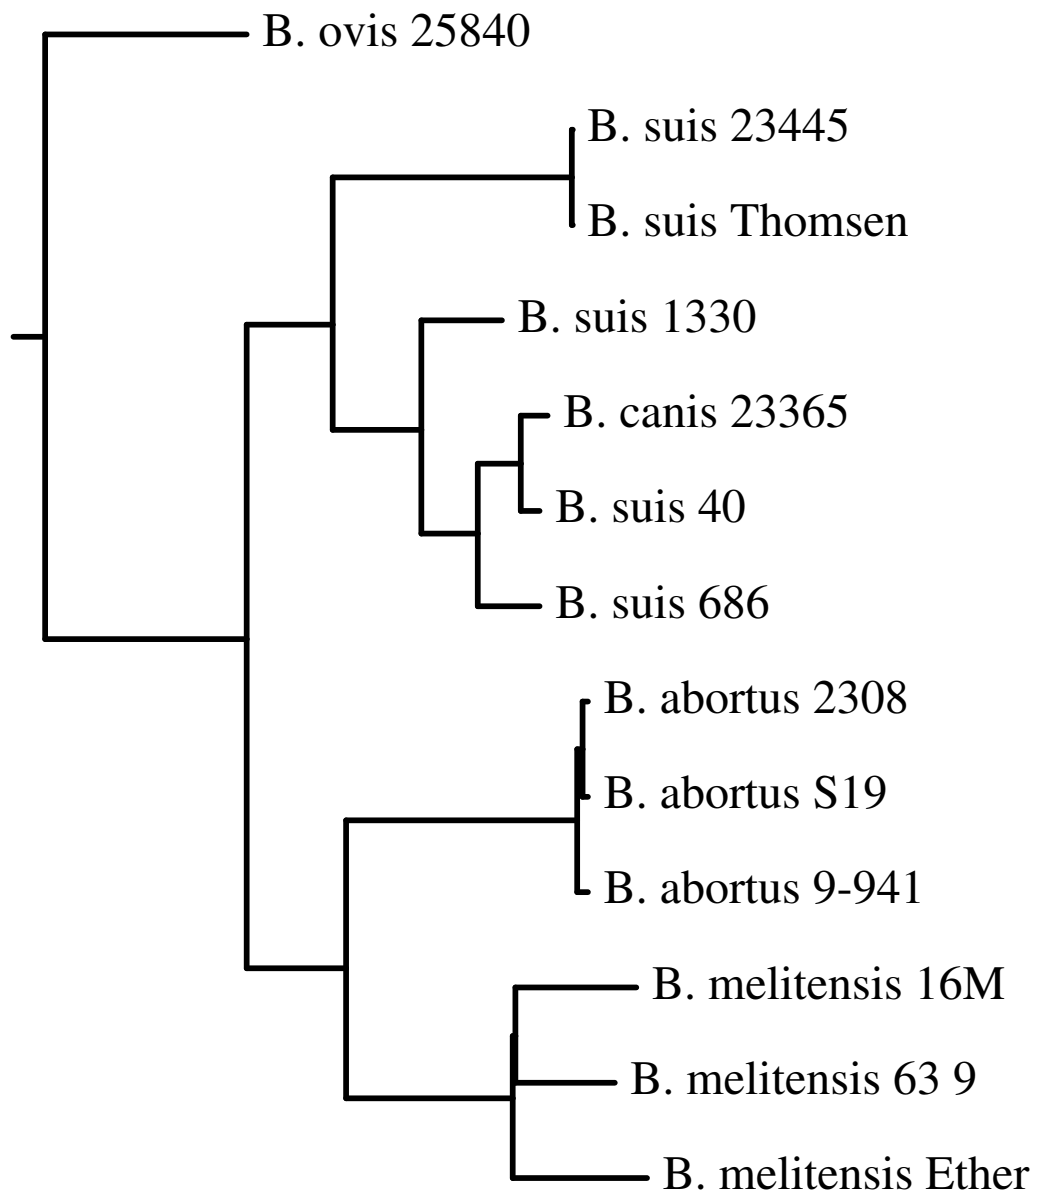

Figure 4: Tree calculated with distance matrix from *FSWM* with  $w = 12$  (default value)

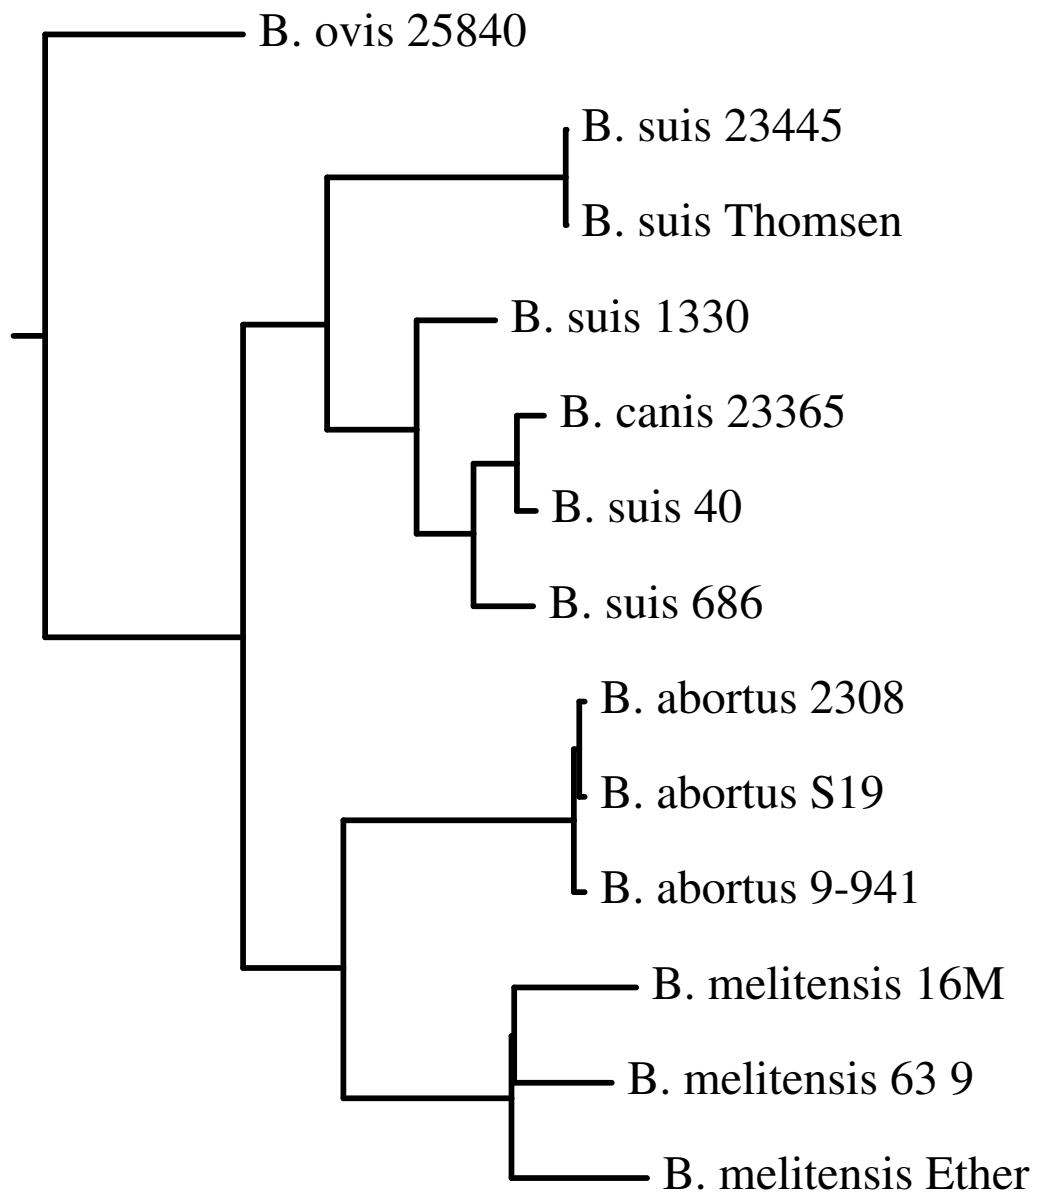

Figure 5: Tree calculated with distance matrix from *FSWM* with  $w = 13$

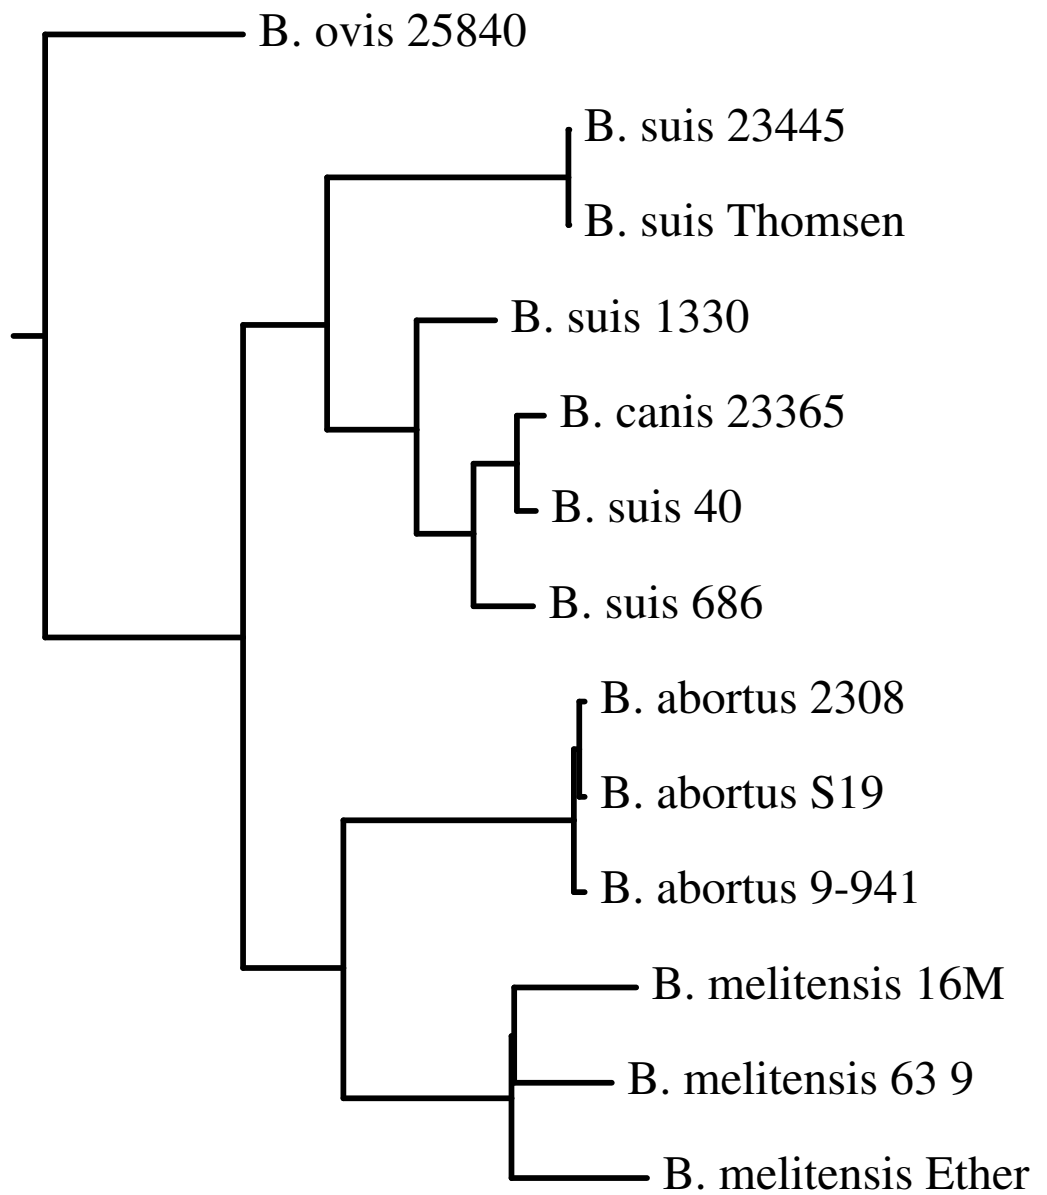

Figure 6: Tree calculated with distance matrix from *FSWM* with  $w = 14$
